# Supplementary material for: Machine-learning-assisted discovery of 212-Zintl-phase compounds with ultra-low lattice thermal conductivity
Source: Royal Society of Chemistry journal article supplement (doi:10.1039/d3ta05690b), 2023-12-01
Supplement: d3ta05690b1.pdf [file d3ta05690b1.pdf]

## Supplementary Information for

### Machine-Learning-Assisted Discovery of 212-Zintl-phase Compounds with Ultra-low Lattice Thermal Conductivity

Qi Ren<sup>a</sup>, Dali Chen<sup>a</sup>, Lixiang Rao<sup>a</sup>, Yingzhuo Lun<sup>a</sup>, Gang Tang<sup>b,\*</sup>, and Jiawang  
Hong<sup>a,\*</sup>

<sup>a</sup> School of Aerospace Engineering, Beijing Institute of Technology, Beijing, 100081,  
China

<sup>b</sup> Advanced Research Institute of Multidisciplinary Science, Beijing Institute of  
Technology, Beijing 100081, China.

\* Corresponding author E-mail:

[gtang@bit.edu.cn](mailto:gtang@bit.edu.cn) (Gang Tang),

[hongjw@bit.edu.cn](mailto:hongjw@bit.edu.cn) (Jiawang Hong)

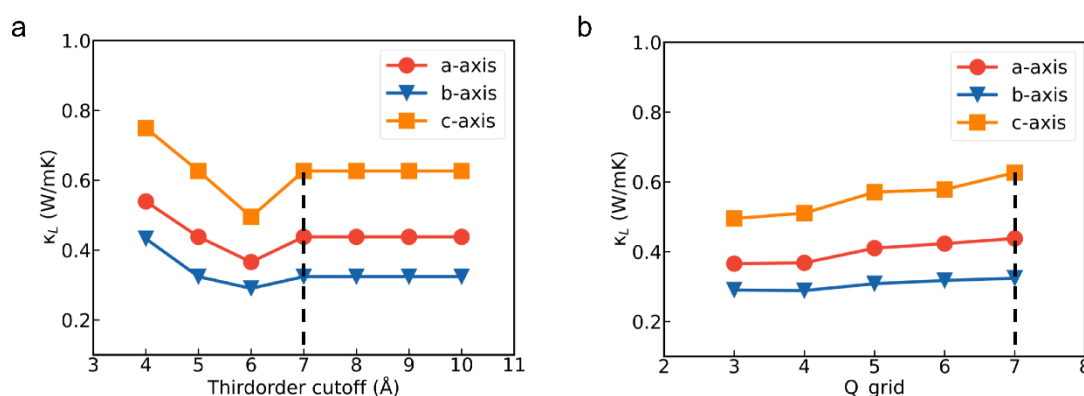

**Figure S1.** Convergence test of the third-order cutoff (a), and the q grids (b) of the TDEP calculation.

**Table S1.** The details of the database as well as the references. (See [TableS1.pdf](#))

**Table S2.** The optimized hyperparameters for the ML models.

| Symbol       | Definition                               | Value |
|--------------|------------------------------------------|-------|
| n_estimators | The number of boosting stages to perform | 453   |

|               |                                                           |      |
|---------------|-----------------------------------------------------------|------|
| learning_rate | Adjustment the contribution of each tree                  | 0.07 |
| max_depth     | The maximum depth of the individual regression estimators | 3    |

**Table S3.** The details of the predicted results.

| Formula                           | Temperature (K) | $\kappa_L$ (W/(mK)) |
|-----------------------------------|-----------------|---------------------|
| Ca <sub>2</sub> CdP <sub>2</sub>  | 300             | 3.418999291         |
|                                   | 400             | 2.622836393         |
|                                   | 500             | 2.13224968          |
|                                   | 600             | 1.864276224         |
|                                   | 700             | 1.59660608          |
|                                   | 800             | 1.343485272         |
|                                   | 900             | 1.316505932         |
|                                   | 1000            | 1.305298445         |
| Sr <sub>2</sub> ZnP <sub>2</sub>  | 300             | 2.103014068         |
|                                   | 400             | 1.613324079         |
|                                   | 500             | 1.322628937         |
|                                   | 600             | 1.141592994         |
|                                   | 700             | 0.813907198         |
|                                   | 800             | 0.525875164         |
|                                   | 900             | 0.501868052         |
|                                   | 1000            | 0.495753319         |
| Sr <sub>2</sub> ZnAs <sub>2</sub> | 300             | 1.276798589         |
|                                   | 400             | 1.043000778         |
|                                   | 500             | 0.948903528         |
|                                   | 600             | 0.872226682         |
|                                   | 700             | 0.661412228         |
|                                   | 800             | 0.463096048         |
|                                   | 900             | 0.451040705         |
|                                   | 1000            | 0.445703501         |
| Sr <sub>2</sub> ZnBi <sub>2</sub> | 300             | 1.560371412         |
|                                   | 400             | 1.24105267          |
|                                   | 500             | 1.006770516         |
|                                   | 600             | 0.843030479         |
|                                   | 700             | 0.742227151         |
|                                   | 800             | 0.474955594         |
|                                   | 900             | 0.441875716         |
|                                   | 1000            | 0.436557762         |
| Sr <sub>2</sub> CdAs <sub>2</sub> | 300             | 2.277186172         |
|                                   | 400             | 1.786981374         |
|                                   | 500             | 1.359191182         |
|                                   | 600             | 1.225550508         |
|                                   | 700             | 1.163023743         |
|                                   | 800             | 1.035981407         |

|                                   |      |             |
|-----------------------------------|------|-------------|
|                                   | 900  | 1.020572827 |
|                                   | 1000 | 1.01014287  |
| Ba <sub>2</sub> ZnBi <sub>2</sub> | 300  | 1.034144346 |
|                                   | 400  | 0.897010956 |
|                                   | 500  | 0.866224312 |
|                                   | 600  | 0.690121451 |
|                                   | 700  | 0.699817386 |
|                                   | 800  | 0.526505901 |
|                                   | 900  | 0.505775346 |
|                                   | 1000 | 0.500457392 |
| Ba <sub>2</sub> CdAs <sub>2</sub> | 300  | 1.124192111 |
|                                   | 400  | 0.8439103   |
|                                   | 500  | 0.749626657 |
|                                   | 600  | 0.660855075 |
|                                   | 700  | 0.607433838 |
|                                   | 800  | 0.454958862 |
|                                   | 900  | 0.449877248 |
|                                   | 1000 | 0.437217754 |
| Eu <sub>2</sub> ZnP <sub>2</sub>  | 300  | 2.879037083 |
|                                   | 400  | 2.216380811 |
|                                   | 500  | 1.970393072 |
|                                   | 600  | 1.670651611 |
|                                   | 700  | 1.515454436 |
|                                   | 800  | 1.359146627 |
|                                   | 900  | 1.34458557  |
|                                   | 1000 | 1.333378083 |
| Eu <sub>2</sub> ZnBi <sub>2</sub> | 300  | 1.426441981 |
|                                   | 400  | 1.1879422   |
|                                   | 500  | 1.020322726 |
|                                   | 600  | 0.819434962 |
|                                   | 700  | 0.697180325 |
|                                   | 800  | 0.404016503 |
|                                   | 900  | 0.38991408  |
|                                   | 1000 | 0.389136551 |

---
