# Supplementary material for: Machine-learning-assisted discovery of 212-Zintl-phase compounds with ultra-low lattice thermal conductivity
Source: Royal Society of Chemistry journal article supplement (doi:10.1039/d3ta05690b), 2023-12-01
Supplement: d3ta05690b2.pdf [file d3ta05690b2.pdf]

**Table S1.** The details of the database as well as the references.

| Formula                                        | Temperature (K) | $\kappa_L$ (W/(mK)) |
|------------------------------------------------|-----------------|---------------------|
| YbCd <sub>2</sub> Sb <sub>2</sub> <sup>1</sup> | 298.03          | 2.05145             |
|                                                | 323.645         | 1.93569             |
|                                                | 352.217         | 1.83923             |
|                                                | 373.892         | 1.72347             |
|                                                | 398.522         | 1.66559             |
|                                                | 422.167         | 1.55949             |
|                                                | 447.783         | 1.53055             |
|                                                | 475.369         | 1.43408             |
|                                                | 500.985         | 1.36656             |
|                                                | 520.69          | 1.32797             |
|                                                | 548.276         | 1.2701              |
|                                                | 573.892         | 1.22186             |
|                                                | 598.522         | 1.18328             |
|                                                | 626.108         | 1.16399             |
|                                                | 650.739         | 1.1254              |
|                                                | 673.399         | 1.10611             |
|                                                | 700             | 1.10611             |
| YbZn <sub>2</sub> Sb <sub>2</sub> <sup>1</sup> | 300             | 3.79743             |
|                                                | 327.586         | 3.67203             |
|                                                | 347.291         | 3.55627             |
|                                                | 374.877         | 3.44051             |
|                                                | 399.507         | 3.34405             |
|                                                | 422.167         | 3.26688             |
|                                                | 447.783         | 3.17042             |
|                                                | 474.384         | 3.06431             |
|                                                | 497.044         | 2.96785             |
|                                                | 526.601         | 2.88103             |
|                                                | 550.246         | 2.79421             |
|                                                | 575.862         | 2.7074              |
|                                                | 604.433         | 2.60129             |
|                                                | 625.123         | 2.51447             |
|                                                | 646.798         | 2.41801             |
|                                                | 676.355         | 2.36977             |
|                                                | 696.059         | 2.28296             |
| Sr <sub>3</sub> AlSb <sub>3</sub> <sup>2</sup> | 297.186         | 1.12421             |
|                                                | 317.522         | 1.03575             |
|                                                | 366.973         | 0.917565            |
|                                                | 422.317         | 0.831995            |
|                                                | 471.369         | 0.779173            |

|                                                              |         |          |
|--------------------------------------------------------------|---------|----------|
|                                                              | 518.859 | 0.732904 |
|                                                              | 569.316 | 0.699675 |
|                                                              | 618.229 | 0.66973  |
|                                                              | 667.162 | 0.636517 |
|                                                              | 719.082 | 0.613076 |
|                                                              | 774.067 | 0.586333 |
|                                                              | 819.875 | 0.566226 |
|                                                              | 871.714 | 0.555858 |
|                                                              | 925.037 | 0.552009 |
|                                                              | 972.288 | 0.544958 |
| Sr <sub>5</sub> Al <sub>2</sub> Sb <sub>6</sub> <sup>3</sup> | 317     | 0.882    |
|                                                              | 374     | 0.774    |
|                                                              | 426     | 0.718    |
|                                                              | 469     | 0.701    |
|                                                              | 476     | 0.681    |
|                                                              | 525     | 0.649    |
|                                                              | 577     | 0.622    |
|                                                              | 625     | 0.609    |
|                                                              | 675     | 0.589    |
|                                                              | 727     | 0.563    |
|                                                              | 775     | 0.553    |
|                                                              | 824     | 0.547    |
|                                                              | 873     | 0.537    |
| Ca <sub>5</sub> In <sub>2</sub> Sb <sub>6</sub> <sup>4</sup> | 320.045 | 1.13117  |
|                                                              | 321.158 | 1.09783  |
|                                                              | 370.156 | 0.970541 |
|                                                              | 372.383 | 0.947615 |
|                                                              | 423.608 | 0.864068 |
|                                                              | 469.265 | 0.793045 |
|                                                              | 526.058 | 0.742808 |
|                                                              | 572.829 | 0.700947 |
|                                                              | 627.394 | 0.677803 |
|                                                              | 676.392 | 0.650515 |
|                                                              | 722.049 | 0.637825 |
|                                                              | 774.388 | 0.656357 |
| Sr <sub>5</sub> In <sub>2</sub> Sb <sub>6</sub> <sup>4</sup> | 304.454 | 1.0979   |
|                                                              | 324.499 | 1.05615  |
|                                                              | 373.497 | 0.93511  |
|                                                              | 374.61  | 0.922606 |
|                                                              | 425.835 | 0.851559 |
|                                                              | 471.492 | 0.795119 |
|                                                              | 523.831 | 0.753234 |
|                                                              | 573.942 | 0.721775 |
|                                                              | 622.94  | 0.713238 |

|                                                  |         |          |
|--------------------------------------------------|---------|----------|
|                                                  | 673.051 | 0.717196 |
|                                                  | 720.935 | 0.700329 |
|                                                  | 777.728 | 0.760509 |
| CaMg <sub>2</sub> Bi <sub>2</sub> <sup>5</sup>   | 301.86  | 2.88589  |
|                                                  | 376.144 | 2.40007  |
|                                                  | 476.021 | 1.85354  |
|                                                  | 580.594 | 1.50105  |
|                                                  | 680.093 | 1.24459  |
|                                                  | 781.909 | 1.05423  |
|                                                  | 819.8   | 0.998862 |
|                                                  | 869.626 | 0.946854 |
| YbMg <sub>2</sub> Bi <sub>2</sub> <sup>5</sup>   | 298.68  | 2.58118  |
|                                                  | 372.736 | 2.22288  |
|                                                  | 473.97  | 1.72634  |
|                                                  | 579.458 | 1.38679  |
|                                                  | 676.809 | 1.14657  |
|                                                  | 779.062 | 0.973181 |
|                                                  | 816.393 | 0.91476  |
|                                                  | 864.098 | 0.865582 |
| CaZn <sub>2</sub> Sb <sub>2</sub> <sup>6</sup>   | 301.536 | 2.4715   |
|                                                  | 373.923 | 1.99156  |
|                                                  | 473.676 | 1.57264  |
|                                                  | 572.546 | 1.2948   |
|                                                  | 668.768 | 1.11202  |
|                                                  | 767.638 | 0.928848 |
| EuZn <sub>2</sub> Sb <sub>2</sub> <sup>7</sup>   | 300     | 2.62501  |
|                                                  | 348.93  | 2.22692  |
|                                                  | 401.07  | 2.03045  |
|                                                  | 450.802 | 1.84663  |
|                                                  | 500.535 | 1.72583  |
|                                                  | 551.872 | 1.61131  |
|                                                  | 600     | 1.50316  |
|                                                  | 651.337 | 1.45166  |
| EuCd <sub>2</sub> Sb <sub>2</sub> <sup>7</sup>   | 299.198 | 1.40864  |
|                                                  | 350.535 | 1.20588  |
|                                                  | 399.465 | 1.06619  |
|                                                  | 451.604 | 0.97056  |
|                                                  | 500.535 | 0.881297 |
|                                                  | 548.663 | 0.836168 |
|                                                  | 598.396 | 0.778401 |
|                                                  | 649.733 | 0.74581  |
| Yb(Cd) <sub>2</sub> Sb <sub>2</sub> <sup>7</sup> | 297.61  | 2.05526  |
|                                                  | 337.712 | 1.81842  |
|                                                  | 375.852 | 1.64298  |

|                                                |         |          |
|------------------------------------------------|---------|----------|
|                                                | 411.396 | 1.50263  |
|                                                | 450.162 | 1.37105  |
|                                                | 488.266 | 1.27895  |
|                                                | 525.078 | 1.19123  |
|                                                | 562.524 | 1.12982  |
|                                                | 599.315 | 1.09035  |
| EuAgSb <sup>8</sup>                            | 306.691 | 0.949905 |
|                                                | 374.165 | 0.774944 |
|                                                | 476.625 | 0.658775 |
|                                                | 579.084 | 0.547832 |
|                                                | 629.065 | 0.500212 |
|                                                | 679.045 | 0.457816 |
|                                                | 784.004 | 0.190105 |
|                                                | 732.378 | 0.305721 |
| EuCuSb <sup>8</sup>                            | 306.691 | 1.84157  |
|                                                | 374.165 | 1.57953  |
|                                                | 476.625 | 1.22651  |
|                                                | 576.585 | 1.00588  |
|                                                | 629.065 | 0.876381 |
|                                                | 676.546 | 0.799185 |
|                                                | 729.025 | 0.629628 |
|                                                | 785.1   | 0.376974 |
| SrAgSb <sup>8</sup>                            | 306.691 | 1.59079  |
|                                                | 371.666 | 1.40192  |
|                                                | 474.126 | 1.13947  |
|                                                | 574.212 | 0.992919 |
|                                                | 629.226 | 0.905998 |
|                                                | 677.364 | 0.843121 |
|                                                | 732.378 | 0.703484 |
|                                                | 783.954 | 0.616604 |
| SrCd <sub>2</sub> Sb <sub>2</sub> <sup>9</sup> | 299.887 | 2.01743  |
|                                                | 328.108 | 1.86417  |
|                                                | 351.244 | 1.72701  |
|                                                | 371.583 | 1.6031   |
|                                                | 417.346 | 1.42041  |
|                                                | 401.408 | 1.49541  |
|                                                | 448.357 | 1.31361  |
|                                                | 478.404 | 1.2366   |
|                                                | 500     | 1.17362  |
|                                                | 523.944 | 1.12457  |
|                                                | 549.765 | 1.06854  |
|                                                | 576.056 | 1.01947  |
|                                                | 600.469 | 0.984372 |
|                                                | 624.883 | 0.956252 |

|                                                   |          |          |
|---------------------------------------------------|----------|----------|
|                                                   | 650.235  | 0.931612 |
|                                                   | 675.587  | 0.910461 |
|                                                   | 699.531  | 0.885834 |
| Eu <sub>2</sub> ZnSb <sub>2</sub> <sup>10</sup>   | 300      | 0.417532 |
|                                                   | 373.4694 | 0.398107 |
|                                                   | 473.1778 | 0.379586 |
|                                                   | 572.8863 | 0.36772  |
|                                                   | 621.8659 | 0.36772  |
|                                                   | 672.5948 | 0.36772  |
|                                                   | 721.5743 | 0.373606 |
|                                                   | 770.5539 | 0.385662 |
|                                                   | 821.2828 | 0.385662 |
| EuMg <sub>2</sub> Bi <sub>2</sub> <sup>10</sup>   | 305.2478 | 3.918352 |
|                                                   | 376.9679 | 2.897804 |
|                                                   | 474.9271 | 2.283603 |
|                                                   | 571.137  | 1.799585 |
|                                                   | 674.344  | 1.487352 |
|                                                   | 772.3032 | 1.209925 |
|                                                   | 875.5102 | 1.016007 |
| Sr <sub>2</sub> ZnSb <sub>2</sub> <sup>11</sup>   | 300.1918 | 0.48666  |
|                                                   | 400.1342 | 0.339186 |
|                                                   | 499.7128 | 0.260407 |
| Yb <sub>14</sub> MnSb <sub>11</sub> <sup>12</sup> | 302.7575 | 0.460227 |
|                                                   | 326.9316 | 0.467045 |
|                                                   | 351.1057 | 0.473864 |
|                                                   | 375.2799 | 0.480682 |
|                                                   | 401.3127 | 0.4875   |
|                                                   | 427.335  | 0.4875   |
|                                                   | 451.4986 | 0.4875   |
|                                                   | 477.5209 | 0.4875   |
|                                                   | 501.6898 | 0.490909 |
|                                                   | 525.8428 | 0.484091 |
|                                                   | 550.0011 | 0.480682 |
|                                                   | 576.0181 | 0.477273 |
|                                                   | 602.0298 | 0.470455 |
|                                                   | 626.1881 | 0.467045 |
|                                                   | 650.3464 | 0.463636 |
|                                                   | 676.3634 | 0.460227 |
|                                                   | 700.5164 | 0.453409 |
|                                                   | 726.5282 | 0.446591 |
|                                                   | 750.6917 | 0.446591 |
|                                                   | 776.7035 | 0.439773 |
|                                                   | 800.8618 | 0.436364 |
|                                                   | 825.0201 | 0.432955 |

|                                                               |          |          |
|---------------------------------------------------------------|----------|----------|
|                                                               | 849.1784 | 0.429545 |
|                                                               | 877.0594 | 0.429545 |
|                                                               | 901.2177 | 0.426136 |
|                                                               | 925.3813 | 0.426136 |
|                                                               | 951.4036 | 0.426136 |
|                                                               | 975.5671 | 0.426136 |
|                                                               | 999.7254 | 0.422727 |
|                                                               | 1025.748 | 0.422727 |
|                                                               | 1051.77  | 0.422727 |
|                                                               | 1075.934 | 0.422727 |
|                                                               | 1100.097 | 0.422727 |
|                                                               | 1124.261 | 0.422727 |
|                                                               | 1150.283 | 0.422727 |
|                                                               | 1176.311 | 0.426136 |
|                                                               | 1200.479 | 0.429545 |
|                                                               | 1226.512 | 0.436364 |
|                                                               | 1250.686 | 0.443182 |
|                                                               | 1274.866 | 0.453409 |
| Yb <sub>14</sub> AlSb <sub>11</sub> <sup>13</sup>             | 350      | 0.66055  |
|                                                               | 473.0769 | 0.591743 |
|                                                               | 598.0769 | 0.582569 |
|                                                               | 725      | 0.610092 |
|                                                               | 848.0769 | 0.651376 |
|                                                               | 975      | 0.711009 |
|                                                               | 1100     | 0.784404 |
|                                                               | 1225     | 0.876147 |
| Ca <sub>5</sub> Al <sub>2</sub> Sb <sub>6</sub> <sup>14</sup> | 304.7374 | 1.526154 |
|                                                               | 326.7902 | 1.485128 |
|                                                               | 375.8727 | 1.288205 |
|                                                               | 426.7204 | 1.152821 |
|                                                               | 475.8902 | 1.037949 |
|                                                               | 525.0904 | 0.951795 |
|                                                               | 576.0035 | 0.877949 |
|                                                               | 625.2343 | 0.820513 |
|                                                               | 674.4737 | 0.771282 |
|                                                               | 725.4391 | 0.746667 |
|                                                               | 774.7047 | 0.722051 |
|                                                               | 825.6788 | 0.705641 |
|                                                               | 876.6572 | 0.693333 |
| Sr <sub>3</sub> GaSb <sub>3</sub> <sup>15</sup>               | 307.6451 | 1.061981 |
|                                                               | 331.2154 | 1.008307 |
|                                                               | 348.8802 | 0.97508  |
|                                                               | 372.4505 | 0.921406 |
|                                                               | 425.431  | 0.829393 |

|                                                 |          |          |
|-------------------------------------------------|----------|----------|
|                                                 | 479.8128 | 0.773163 |
|                                                 | 526.8457 | 0.724601 |
|                                                 | 578.242  | 0.696486 |
|                                                 | 628.1759 | 0.665815 |
|                                                 | 675.1619 | 0.642812 |
|                                                 | 725.0912 | 0.614696 |
|                                                 | 776.4688 | 0.596805 |
|                                                 | 827.8463 | 0.578914 |
|                                                 | 874.7854 | 0.58147  |
|                                                 | 923.2102 | 0.573802 |
|                                                 | 974.5831 | 0.558466 |
| CaCd <sub>2</sub> Sb <sub>2</sub> <sup>16</sup> | 298.5138 | 1.533469 |
|                                                 | 347.7707 | 0.997972 |
|                                                 | 398.7261 | 0.851927 |
|                                                 | 449.6815 | 0.827586 |
|                                                 | 498.9384 | 0.778905 |
|                                                 | 599.1507 | 0.705882 |
| YbMn <sub>2</sub> Sb <sub>2</sub> <sup>17</sup> | 300      | 2.723404 |
|                                                 | 350.4    | 2.717021 |
|                                                 | 400.1    | 2.531915 |
|                                                 | 449.8    | 2.282979 |
|                                                 | 500.2    | 2.110638 |
|                                                 | 549.9    | 2.065957 |
|                                                 | 600.3    | 1.982979 |
|                                                 | 650      | 1.912766 |
| BaCu <sub>2</sub> Te <sub>2</sub> <sup>18</sup> | 324.2616 | 0.610442 |
|                                                 | 373.8397 | 0.543601 |
|                                                 | 422.3629 | 0.458691 |
|                                                 | 474.0506 | 0.38928  |
|                                                 | 523.6287 | 0.374052 |
|                                                 | 573.2068 | 0.363985 |
|                                                 | 623.8397 | 0.37715  |
|                                                 | 672.3629 | 0.328368 |
|                                                 | 721.9409 | 0.284753 |
|                                                 | 772.5738 | 0.238563 |
|                                                 | 823.2068 | 0.236243 |
| EuMg <sub>2</sub> Sb <sub>2</sub> <sup>19</sup> | 304.3478 | 3.706349 |
|                                                 | 351.087  | 3.198413 |
|                                                 | 401.087  | 2.746032 |
|                                                 | 450      | 2.444444 |
|                                                 | 500      | 2.174603 |
|                                                 | 550      | 1.968254 |
|                                                 | 600      | 1.785714 |
|                                                 | 650      | 1.642857 |

|                                                 |          |          |
|-------------------------------------------------|----------|----------|
|                                                 | 700      | 1.52381  |
|                                                 | 748.913  | 1.412698 |
| YbMg <sub>2</sub> Sb <sub>2</sub> <sup>20</sup> | 305.4201 | 3.032051 |
|                                                 | 317.6152 | 2.786325 |
|                                                 | 373.1707 | 2.497863 |
|                                                 | 423.3062 | 2.241453 |
|                                                 | 472.0867 | 1.995726 |
|                                                 | 522.2222 | 1.792735 |
|                                                 | 575.0678 | 1.643162 |
|                                                 | 623.8482 | 1.514957 |
|                                                 | 673.9837 | 1.418803 |
|                                                 | 725.4743 | 1.344017 |
|                                                 | 778.3198 | 1.247863 |
| BaCd <sub>2</sub> As <sub>2</sub> <sup>21</sup> | 300      | 2.833992 |
|                                                 | 322.541  | 2.501976 |
|                                                 | 371.7213 | 2.146245 |
|                                                 | 422.9508 | 1.897233 |
|                                                 | 473.1557 | 1.743083 |
|                                                 | 523.3607 | 1.588933 |
|                                                 | 573.5656 | 1.458498 |
|                                                 | 623.7705 | 1.363636 |
|                                                 | 672.9508 | 1.280632 |
|                                                 | 723.1557 | 1.221344 |
|                                                 | 773.3607 | 1.173913 |
| SrZn <sub>2</sub> Sb <sub>2</sub> <sup>22</sup> | 330.4514 | 1.927374 |
|                                                 | 352.5785 | 1.832402 |
|                                                 | 374.7055 | 1.73743  |
|                                                 | 396.8325 | 1.642458 |
|                                                 | 421.7361 | 1.558659 |
|                                                 | 448.4898 | 1.480447 |
|                                                 | 473.3985 | 1.407821 |
|                                                 | 498.3098 | 1.340782 |
|                                                 | 524.1501 | 1.284916 |
|                                                 | 549.9852 | 1.217877 |
|                                                 | 574.9042 | 1.167598 |
|                                                 | 600.747  | 1.117318 |
|                                                 | 623.8211 | 1.072626 |
|                                                 | 651.5115 | 1.022346 |
|                                                 | 676.4383 | 0.988827 |
|                                                 | 701.3676 | 0.960894 |
|                                                 | 726.297  | 0.932961 |

---



## References

- 1 X.-J. Wang, M.-B. Tang, H.-H. Chen, X.-X. Yang, J.-T. Zhao, U. Burkhardt and Y. Grin, *Applied Physics Letters*, 2009, **94**, 092106.
- 2 A. Zevalkink, G. Pomrehn, Y. Takagiwa, J. Swallow and G. J. Snyder, *ChemSusChem*, 2013, **6**, 2316–2321.
- 3 A. Zevalkink, Y. Takagiwa, K. Kitahara, K. Kimura and G. J. Snyder, *Dalton Trans.*, 2014, **43**, 4720–4725.
- 4 A. Zevalkink, S. Chanakian, U. Aydemir, A. Ormeci, G. Pomrehn, S. Bux, J.-P. Fleurial and G. J. Snyder, *Journal of Physics: Condensed Matter*, 2014, **27**, 015801.
- 5 J. Shuai, Z. Liu, H. S. Kim, Y. Wang, J. Mao, R. He, J. Sui and Z. Ren, *J. Mater. Chem. A*, 2016, **4**, 4312–4320.
- 6 J. Shuai, Y. Wang, Z. Liu, H. S. Kim, J. Mao, J. Sui and Z. Ren, *Nano Energy*, 2016, **25**, 136–144.
- 7 K. GUO, Q. CAO and J. ZHAO, *Journal of Rare Earths*, 2013, **31**, 1029–1038.
- 8 W. Zhang, C. Chen, H. Yao, W. Xue, S. Li, F. Bai, Y. Huang, X. Li, X. Lin, F. Cao, J. Sui, S. Wang, B. Yu, Y. Wang, X. Liu and Q. Zhang, *Chem. Mater.*, 2020, **32**, 6983–6989.
- 9 M. Jin, L. Zheng, C. Sun, L. Jiang, X. Meng, Q. Chen and W. Li, *Chemical Engineering Journal*, 2021, **420**, 130530.
- 10 C. Chen, W. Xue, S. Li, Z. Zhang, X. Li, X. Wang, Y. Liu, J. Sui, X. Liu, F. Cao, Z. Ren, C.-W. Chu, Y. Wang and Q. Zhang, *Proceedings of the National Academy of Sciences*, 2019, **116**, 2831–2836.
- 11 C. Wang, Q. Wang, Q. Zhang, C. Chen and Y. Chen, *Chem. Mater.*, 2022, **34**, 7837–7844.
- 12 G. Cerretti, O. Villalpando, J.-P. Fleurial and S. K. Bux, *Journal of Applied Physics*, 2019, **126**, 175102.
- 13 C. A. Cox, E. S. Toberer, A. A. Levchenko, S. R. Brown, G. J. Snyder, A. Navrotsky and S. M. Kauzlarich, *Chem. Mater.*, 2009, **21**, 1354–1360.
- 14 E. S. Toberer, A. Zevalkink, N. Crisosto and G. J. Snyder, *Advanced Functional Materials*, 2010, **20**, 4375–4380.
- 15 A. Zevalkink, W. G. Zeier, G. Pomrehn, E. Schechtel, W. Tremel and G. J. Snyder, *Energy Environ. Sci.*, 2012, **5**, 9121–9128.
- 16 T. Pandey and A. K. Singh, *Phys. Chem. Chem. Phys.*, 2015, **17**, 16917–16926.
- 17 K. Guo, Q.-G. Cao, X.-J. Feng, M.-B. Tang, H.-H. Chen, X. Guo, L. Chen, Y. Grin and J.-T. Zhao, *European Journal of Inorganic Chemistry*, 2011, **2011**, 4043–4048.
- 18 K. Guo, J. Lin, Y. Li, Y. Zhu, X. Li, X. Yang, J. Xing, J. Yang, J. Luo and J.-T. Zhao, *J. Mater. Chem. A*, 2020, **8**, 5323–5331.
- 19 C. Sun, W. Li, X. Shi, Z. Bu, P. Nan, Y. Li, B. Ge and Y. Pei, *J. Mater. Chem. A*, 2020, **8**, 8345–8351.
- 20 Z. Zhang, X. Wang, Y. Liu, C. Chen, H. Yao, L. Yin, X. Li, S. Li, F. Zhang, F. Bai, J. Sui, B. Yu, F. Cao, X. Liu, J. Mao, G. Xie and Q. Zhang, *Journal of Materiomics*, 2019, **5**, 583–589.
- 21 H. Kunioka, K. Kihou, H. Nishiate, A. Yamamoto, H. Usui, K. Kuroki and C. H. Lee, *Dalton Trans.*, 2018, **47**, 16205–16210.

22E. S. Toberer, A. F. May, B. C. Melot, E. Flage-Larsen and G. J. Snyder, *Dalton Trans.*, 2010, **39**, 1046–1054.
